# Supplementary material for: Comparative Proteomic Analysis of Rhizoctonia solani Isolates Identifies the Differentially Expressed Proteins with Roles in Virulence
Source: MDPI journal article supplement (doi:10.3390/jof8040370), 2022-04-05
Supplement: s1 [file s1]

Table S1: List of gene-specific primers for qRT-PCR

| Genes                                       | Forward                 | Reverse                 |
|---------------------------------------------|-------------------------|-------------------------|
| Phenylalanine ammonia-lyase                 | CCAATACTAATCCCGAAGGTCTC | GACCAAACGCATAATCTCCATTC |
| Squalene synthase                           | GAACCTCGGACTTCCCGAAA    | CGCGCATACAAGCAGAAAG     |
| Cyanate hydratase                           | GGGTCTTGGTGTATGGGTATC   | GTTTCCTGTCCACCGTTACA    |
| Actin-like protein ARP6                     | GGATGTTCAATGGTGGTGGA    | CATTTGCCGCTGACAAGTTATT  |
| Topoisomerase 1-associated factor 1         | ACCTGAGGAGAGTCCAAAGA    | ACTGGAATTCGTGGACGTG     |
| JmjC domain histone demethylation protein 1 | GACAAGGACCATGATGGGAAA   | ATGGGCACATCCACATCTTT    |
| GMP synthase (glutamine-hydrolyzing)        | ATCTGCTCCCATATTCGAAGTC  | GGCGCAAGGATTTTCATGTTC   |
| Glycylpeptide N-tetradecanoyltransferase    | CAATGCTCTCACCCTCATGG    | CGGTTCGCCAGTTGTAAAGA    |
| Sulfate adenylyltransferase                 | TGCTGGCGGAAACTTCTT      | TCATCGACACCAGTGAAACC    |
| Glyceraldehyde-3-phosphate dehydrogenase    | GTTGGCGATGAACACTCTTCTA  | ATAGGCGATCAGGTCAACAAC   |
| Pentafunctional AROM polypeptide            | CCGGAGATGCTTCAGTTGAT    | TCCTTCCCTACCACGACTAC    |
